1

## Bacterial strain nomenclature in the genomic era:

2

## Life Identification Numbers using a gene-by-gene approach

3

4 Federica Palma<sup>1,2,#</sup>, Melanie Hennart<sup>1,#</sup>, Keith A. Jolley<sup>3</sup>, Chiara Crestani<sup>1</sup>, Kelly L. Wyres<sup>4,5</sup>,  
5 Sebastien Bridel<sup>1</sup>, Corin A. Yeats<sup>6</sup>, Bryan Brancotte<sup>7</sup>, Brice Raffestin<sup>8</sup>, Sophia David<sup>6</sup>, Margaret M. C.  
6 Lam<sup>4</sup>, Radosław Izdebski<sup>9</sup>, Virginie Passet<sup>1</sup>, Carla Rodrigues<sup>1</sup>, Martin Rethoret-Pasty<sup>1</sup>, Martin C. J.  
7 Maiden<sup>3</sup>, David M. Aanensen<sup>6</sup>, Kathryn E. Holt<sup>4,10</sup>, Alexis Criscuolo<sup>2</sup>, Sylvain Brisse<sup>1,2,\*</sup>

8 <sup>#</sup> Equal contribution

9

### 10 Affiliations

11 <sup>1</sup> Institut Pasteur, Université Paris Cité, Biodiversity and Epidemiology of Bacterial Pathogens, Paris,  
12 France

13 <sup>2</sup> Institut Pasteur, Université Paris Cité, Biological Resource Center of Institut Pasteur, Paris, France

14 <sup>3</sup> Department of Biology, University of Oxford, Oxford, United Kingdom

15 <sup>4</sup> Department of Infectious Diseases, School of Translational Medicine, Monash University,  
16 Melbourne, Australia

17 <sup>5</sup> Centre to Impact AMR, Monash University, Clayton, 3800, Australia

18 <sup>6</sup> Centre for Genomic Pathogen Surveillance, Pandemic Sciences Institute, University of Oxford,  
19 Oxford, United Kingdom

20 <sup>7</sup> Institut Pasteur, Université Paris Cité, Bioinformatics and Biostatistics Hub, Paris, France

21 <sup>8</sup> Institut Pasteur, Université Paris Cité, HPC Core Facility, Paris, France

22 <sup>9</sup> Department of Molecular Microbiology, National Medicines Institute, Warsaw, Poland

23 <sup>10</sup> Department of Infection Biology, London School of Hygiene and Tropical Medicine, London,  
24 United Kingdom

25

26 \* **Correspondence:** Prof Sylvain Brisse, Institut Pasteur, Biodiversity and Epidemiology of Bacterial  
27 Pathogens, 25-28 rue du Docteur Roux, F-75724, Paris, France; Phone: +33 1 45 68 83 34; E-mail:  
28 [sylvain.brisse@pasteur.fr](mailto:sylvain.brisse@pasteur.fr)

## 29 **Abstract**

30 Unified strain taxonomies are crucial for fostering international communication in microbiological  
31 research and for the epidemiological surveillance of bacterial pathogens. While multilocus sequence  
32 typing (MLST) has served as a foundation of strain taxonomy for two decades, whole genome  
33 sequencing enables more precise classifications and significantly improves discriminatory resolution.  
34 The core genome-wide extension of MLST (known as cgMLST) thus holds great promise for strain  
35 genotyping and classification, but its implementation faces challenges that include missing data,  
36 potential instability of cluster-based nomenclatures, and the necessity to ensure backwards  
37 compatibility with MLST identifiers. Life Identification Number (LIN) codes offer a solution by  
38 providing multi-level classification groups that are inherently stable. Here, we present, consolidate,  
39 and extend the cgMLST-based LIN code approach. We first develop a nicknaming system for LIN  
40 code prefixes, which enables flexible human-readable strain nomenclatures. Using *Klebsiella*  
41 *pneumoniae* (Kp) as an example, LIN code nicknames were attributed by inheritance from MLST  
42 identifiers, thus perpetuating the legacy of MLST nomenclatures in the genomic era. We show that  
43 while 7-gene MLST sometimes conflates unrelated sublineages into the same ST, cgMLST-based LIN  
44 codes are highly concordant with phylogenetic relationships. We implement this novel LIN code-  
45 based nomenclature in the BIGSdb platform, and illustrate, with Pathogenwatch, how it can also be  
46 used in other genomic epidemiology platforms. Finally, we demonstrate the value of LIN codes for  
47 tracking the strain diversity within high-risk internationally disseminated clonal groups of Kp and  
48 protracted outbreaks. Given its stability, precision, and flexibility, we recommend the adoption of the  
49 cgMLST-based LIN code taxonomic approach for Kp and suggest that this approach is widely  
50 applicable to other bacterial pathogens.

## 51 **Introduction**

52 Taxonomies of bacterial strains responsible for infectious diseases are essential resources to ensure  
53 effective communication in population biology, epidemiological surveillance, and public health  
54 response to outbreaks. As illustrated by the SARS-CoV-2 variant nomenclature system, simple  
55 nicknames (*e.g.*, Alpha, Delta, Omicron) for pathogen variants can greatly improve communication  
56 between different public health sectors (Konings et al., 2021; Rambaut et al., 2020).

57 Currently, there are neither classification nor nomenclature standards to define sublineages, variants,  
58 types or clones (hereafter, collectively called “strains”) within bacterial species (“International Code of  
59 Nomenclature of Prokaryotes,” 2019). Ad-hoc phenotypic (*e.g.*, serotypes) and genotypic (*e.g.*,  
60 sequence types) approaches have long been used to define strains of particular species, but the advent  
61 of universally applicable whole genome sequencing (WGS) has the potential to refine and generalize  
62 strain taxonomy by providing the maximal discrimination needed for epidemiological surveillance,  
63 and a harmonized general approach across pathogen phyla (Maiden et al., 2013; Nadon et al., 2017;  
64 Struelens and Brisse, 2013). However, few attempts have been made to devise genomic taxonomies  
65 and evaluate their general applicability. With WGS implemented worldwide and in all sectors of  
66 microbiology (medical, veterinary, food, environmental), a precise and universal approach for  
67 describing strains of bacterial species becomes a key need to translate WGS data into relevant  
68 information that would support epidemiological surveillance, outbreak investigations, cross-niche or  
69 between host transmission detection, and public health actions that need international and cross-  
70 sectoral coordination.

71 Among the broad range of methods developed for bacterial strain typing and group naming (Struelens  
72 et al., 1998; van Belkum et al., 2007), multi-locus sequence typing (MLST), based on the analysis of a  
73 few (typically seven) conserved loci, was established over the last two decades as the method of  
74 choice for strain taxonomy of most bacterial species (Aanensen and Spratt, 2005; Maiden, 2006;  
75 Maiden et al., 1998). This gene-by-gene approach was logically extended to the genome scale, with  
76 core genome MLST (cgMLST) schemes encompassing thousands of loci (Bialek-Davenet et al., 2014;  
77 Maiden et al., 2013). Whether using the classical or the core genome MLST schemes, the “sequence  
78 type” (ST) nomenclature system is highly reproducible, portable, and easy to interpret (Feil, 2004). To  
79 recognize deeper phylogenetic associations, cgMLST allele profiles can be grouped at any level of  
80 similarity by single-linkage clustering or static aggregation to predefined groups or founder genotypes  
81 (Zhou et al., 2021).

82 A novel system for genome classification was proposed by Vinatzer and colleagues, using multi-  
83 position numerical codes attributed to each individual genome (Marakeby et al., 2014; Vinatzer et al.,  
84 2017). These codes, called Life Identification Numbers (LINs), were designed to encompass all  
85 domains of life in a single taxonomy, based on the Average Nucleotide Identity (ANI) metric (Goris et

86 al., 2007; Konstantinidis and Tiedje, 2005). However, the ANI-based genome similarity is imprecise  
87 and non-reproducible for nearly identical strains, which are most often compared through sequences of  
88 draft genomes. Leveraging the strengths of both approaches, some of us recently proposed combining  
89 cgMLST and LIN codes to design taxonomies of bacterial strains within species (Hennart et al., 2022).  
90 The use of cgMLST dissimilarities, rather than ANI-based similarities, provides robustness in  
91 estimating small-scale genome relationships, which are efficiently summarized by cgMLST LIN codes  
92 (hereafter, LIN codes for short).

93 In this article, we present further developments of the LIN code approach. We first design a  
94 nicknaming approach for LIN codes, which can be used to recognize familiar groups that are  
95 important in biological research or epidemiological surveillance. We further show the benefit of  
96 inheriting these nicknames from MLST identifiers. We additionally describe practical  
97 implementations of LIN codes in the widely used genotyping platforms BIGSdb (Argimón et al.,  
98 2021; Jolley et al., 2018). We next illustrate the use and benefits of LIN code strain taxonomy using  
99 the *Klebsiella pneumoniae* Species Complex (KpSC), a phenotypically and genetically diverse  
100 ubiquitous pathogenic group (Wyres et al., 2020). We show that for this pathogen, classical (7-gene)  
101 MLST classifications can be misleading, and that LIN codes can pinpoint these cases and mitigate  
102 misclassifications. Lastly, we illustrate the benefit of LIN codes for defining and naming intraspecific  
103 groups from epidemiologically important phylogenetic lineages down to outbreak strains in a stable  
104 way.

## 105 **Section 1: LIN codes: definitions and practical implementation**

### 106 **The principle of cgMLST-based LIN codes: an overview**

107 Here we explain in more detail how cgMLST-based LIN codes work, as originally proposed (Hennart  
108 et al., 2022), before describing new developments and applications of the system (see **Section 2:**  
109 **Novel developments and examples of applications**). The core genome Life Identification Number  
110 classification code system combines the core genome MLST (cgMLST) approach with Life  
111 Identification Numbers (LIN) (Vinatzer et al., 2017). The LIN codes consist of multiple (for example,  
112 10) predefined positions (or bins), each corresponding to a (range of) cgMLST profile similarity value,  
113 together representing a partition of the complete range [0%-100%]. From left to right, the positions of  
114 the code correspond to decreasing allele mismatch dissimilarity, *i.e.*, increasing similarity. The  
115 leftmost bins capture the lowest similarities reflective of deep phylogenetic divisions, whereas the  
116 rightmost bins capture the highest similarities. Each bin has a left border threshold (inclusive) that  
117 corresponds to a maximum number of pairwise allele differences between profiles and is delimited on  
118 the right by the next threshold (exclusive, as the threshold value corresponds to the left threshold of  
119 the downstream bin).

120 While any number of bins (up to the number of loci in the cgMLST scheme) can be chosen, in the case  
121 of the *Klebsiella pneumoniae* Species Complex (KpSC) used here as an example, 10 bins were  
122 determined to define their LIN codes (Hennart et al., 2022). The first four bins represent the deepest  
123 hierarchical levels of relatedness, corresponding to species, subspecies, sublineage and clonal group,  
124 respectively (Hennart et al., 2022). The last bins delineate six levels of high-resolution relatedness that  
125 might be useful for epidemiological surveillance. KpSC profiles are defined using a 629-loci cgMLST  
126 scheme; bins 1 to 4 have as right borders 610, 585, 190 and 43 allele mismatches, respectively, while  
127 bins 5 to 10 correspond to thresholds 10, 7, 4, 2, 1 and 0 mismatches, respectively. Thus, the first bin  
128 corresponds to the range [629-610[ of cgMLST mismatches (the '[' indicates the value 610 is  
129 excluded), whereas the last one corresponds to the range [1-0[ (note that it excludes complete identity,  
130 *i.e.*, 0 mismatch, 629 matches: in this case, the LIN code is simply copied from the reference, see  
131 below).

132 Formally, LIN codes are attributed to core genome Sequence Types (cgST) (Hennart et al., 2022).  
133 Therefore, before assigning LIN codes, cgMLST profiles must be assigned to cgSTs. Like the ST  
134 designation in classical 7-gene MLST, a cgST is defined for each unique cgMLST profile,  
135 characterized by a unique combination of alleles at all loci of the scheme. Profiles with too many  
136 missing loci can be filtered out at this stage. In practice, for the KpSC, cgMLST profiles are assigned  
137 to a cgST only when they comprise fewer than 30 missing alleles (*i.e.*, equal to or more than 600  
138 called alleles). Profiles with 30 (4.77%) or more missing alleles (which are likely to correspond to  
139 poor quality genomes) are not considered further, and therefore not included in the KpSC LIN code

140 taxonomy. For any LIN code taxonomy, the proportion of tolerated missing data for cgST assignment  
141 can be set to higher values (to increase the proportion of coded genomes) or lower values (to improve  
142 the precision of LIN code classifications).

143 LIN codes are created for each distinct cgST. The formal process of LIN code assignment from  
144 cgMLST data, first proposed in (Hennart et al., 2022), is presented in **Box 1** and summarized in  
145 **Figure 1**. The system is initialized by creating, for an initial allelic profile, a LIN code with the integer  
146 value 0 at every bin. This initial profile can be chosen randomly or based on a reference genome of the  
147 species under consideration, as convenient. The next steps are the same for all subsequent individual  
148 cgSTs.

149

### 150 **Box 1. The formal process of assigning LIN codes**

151 The LIN code of the first allelic profile is attributed 0 in every bin. Next, each new allele profile  $j$  is  
152 encoded from its closest already encoded profile  $i$  (*i.e.*, that maximizes the allele similarity percentage  
153  $s_{ij}$ ). After determining the pivot bin  $p$ , such that  $s_{ij} \in [s_p, s_{p+1}[$  (*i.e.*, right threshold exclusive), the  
154 encoding of the new profile  $j$  is performed in three steps:

- 155 (i) the same prefix as code  $i$  is attributed up to the bin  $p-1$  (inclusive);
- 156 (ii) for the pivot bin  $p$ : the maximum value observed in this bin among the subset of codes sharing  
157 the same prefix is incremented by 1;
- 158 (iii) 0 is attributed at each downstream bin from  $p+1$  (inclusive).

159 Of note, when  $s_{ij} = 100\%$ , the LIN code of the new profile  $j$  is given the complete LIN code of  $i$   
160 (including at the last bin).

161 Missing data, equal matches and input order of profiles are handled as explained in **Box 2**.

162

163 The process of assigning a LIN code to a cgMLST profile first involves matching it against all existing  
164 defined LIN-encoded cgSTs to identify its closest neighbor (*i.e.*, the reference profile). If the two  
165 profiles (new and reference) have no dissimilarity (*i.e.*, no allele mismatch among the loci called in  
166 both profiles), the LIN code of the reference is simply assigned to the new profile. This will happen  
167 when the new cgST differs from the reference only by its missing data pattern (see **Box 2**). Otherwise,  
168 when the two profiles differ by at least one allele, a novel LIN code is created. For this, the pivot bin is  
169 defined as the bin in which the observed allele dissimilarity falls, and the novel LIN code is created in  
170 three steps (**Figure 1; Box 1**): (i) copying the LIN code prefix of the reference isolate, *i.e.* from the left  
171 bin up to the pivot bin (excluded); (ii) incrementing by 1 the maximum integer value observed in the

172 pivot bin among the profile(s) sharing the same prefix used at step (i); (iii) attributing the integer value  
 173 0 at the bins downstream of the pivot, corresponding to initialization of the novel subdivision created  
 174 at the pivot bin level.

|                 |                | Bin number:               |      |      |       |       |       |       |       |       |       |     |
|-----------------|----------------|---------------------------|------|------|-------|-------|-------|-------|-------|-------|-------|-----|
|                 |                | 1                         | 2    | 3    | 4     | 5     | 6     | 7     | 8     | 9     | 10    |     |
|                 |                | Max. allelic similarity*: |      |      |       |       |       |       |       |       |       |     |
|                 |                | 19                        | 44   | 439  | 586   | 619   | 622   | 625   | 627   | 628   | 629   |     |
|                 |                | Min. allelic difference*: |      |      |       |       |       |       |       |       |       |     |
|                 |                | 610                       | 585  | 190  | 43    | 10    | 7     | 4     | 2     | 1     | 0     |     |
|                 |                | Bins left thresholds:     |      |      |       |       |       |       |       |       |       |     |
|                 |                | 0                         | 3.02 | 6.99 | 69.79 | 93.16 | 98.41 | 98.88 | 99.36 | 99.68 | 99.84 | 100 |
| <b>Genome A</b> | Initialization | 0                         | 0    | 0    | 0     | 0     | 0     | 0     | 0     | 0     | 0     | 0   |
| <b>Genome B</b> | A (3.50%)      | 0                         | 1    | 0    | 0     | 0     | 0     | 0     | 0     | 0     | 0     | 0   |
| <b>Genome C</b> | B (99.0%)      | 0                         | 1    | 0    | 0     | 0     | 0     | 1     | 0     | 0     | 0     | 0   |
| <b>Genome D</b> | B (7.00%)      | 0                         | 1    | 1    | 0     | 0     | 0     | 0     | 0     | 0     | 0     | 0   |
| ...             | ...            | ...                       |      |      |       |       |       |       |       |       |       |     |
| <b>Genome X</b> | Y (5.00%)      | 0                         | 2    | 0    | 0     | 0     | 0     | 0     | 0     | 0     | 0     | 0   |
| <b>Genome Z</b> | X (98.90%)     | 0                         | 2    | 0    | 0     | 0     | 0     | 1     | 0     | 0     | 0     | 0   |

Coding steps (genome Z):

(i)
(ii)
(iii)

175

176 **Figure 1. Overview of the process of cgMLST-based LIN code assignment.** The process starts with  
 177 assigning cgMLST profiles to genome sequences and classification of profiles into unique core  
 178 genome sequence types (cgST). After an initialization step (full-0 code for the first cgST), LIN codes  
 179 are created for each cgST using the similarity to its closest-related already encoded cgST (steps i, ii  
 180 and iii; see details in main text and Box 1). The bins and their threshold values are those chosen for the  
 181 KpSC. The asterisk (\*) indicates that the values are for the right threshold of each bin, exclusive. Note  
 182 that there is no bin corresponding to complete similarity (gray column on the right), as in this case the  
 183 LIN codes are identical, *i.e.*, there is no need to create a novel LIN code.

184

185 A LIN code prefix can be defined as any bin subset that starts from the leftmost position of the  
 186 complete LIN code. The notion of prefix is important as it conveys a sense of genetic similarity among  
 187 profiles: the longer the common prefix of two LIN codes is, the more similar the two corresponding  
 188 profiles are. For a given cgST profile, its LIN code thus expresses how similar it is to other cgMLST  
 189 profiles. Very different profiles will show identity at few or no prefix positions of their LIN codes,  
 190 whereas nearly identical genomes will have LIN codes identical at most or all positions (see *e.g.*,  
 191 **Figure 1**, genomes Z *versus* X: shared prefix 0\_2\_0\_0\_0\_0 implies a minimum similarity of 98.88%,

192 inclusive, and a maximum similarity of 99.36%, exclusive). Of note, our definition of LIN code prefix  
193 is similar to the LINGroup concept proposed by Vinatzer and colleagues (Vinatzer et al., 2017).

194 An important particularity of LIN codes is that the numerical identifiers at a given bin position (except  
195 the leftmost one) can only be interpreted in the context of the LIN code prefix preceding the  
196 considered bin: the same integer value at a given bin position corresponds to group membership only  
197 if the upstream prefixes are identical. In other words, groups at a given bin position are subdivisions of  
198 the upstream prefixes and are numbered starting from zero independently for each prefix. This  
199 particularity of LIN codes reduces the total number of integer identifiers observed in each position,  
200 making them easier to read than systems in which a group identifier is created independently at each  
201 level (for example, there are currently > 10,000 group identifiers at HierCC-1 level; (Achtman et al.,  
202 2022)). Interestingly, the diversity observed within a group defined by a given prefix can immediately  
203 be deduced from the maximal integer found among its members in the bin immediately downstream of  
204 the prefix length (**Figure 2**).

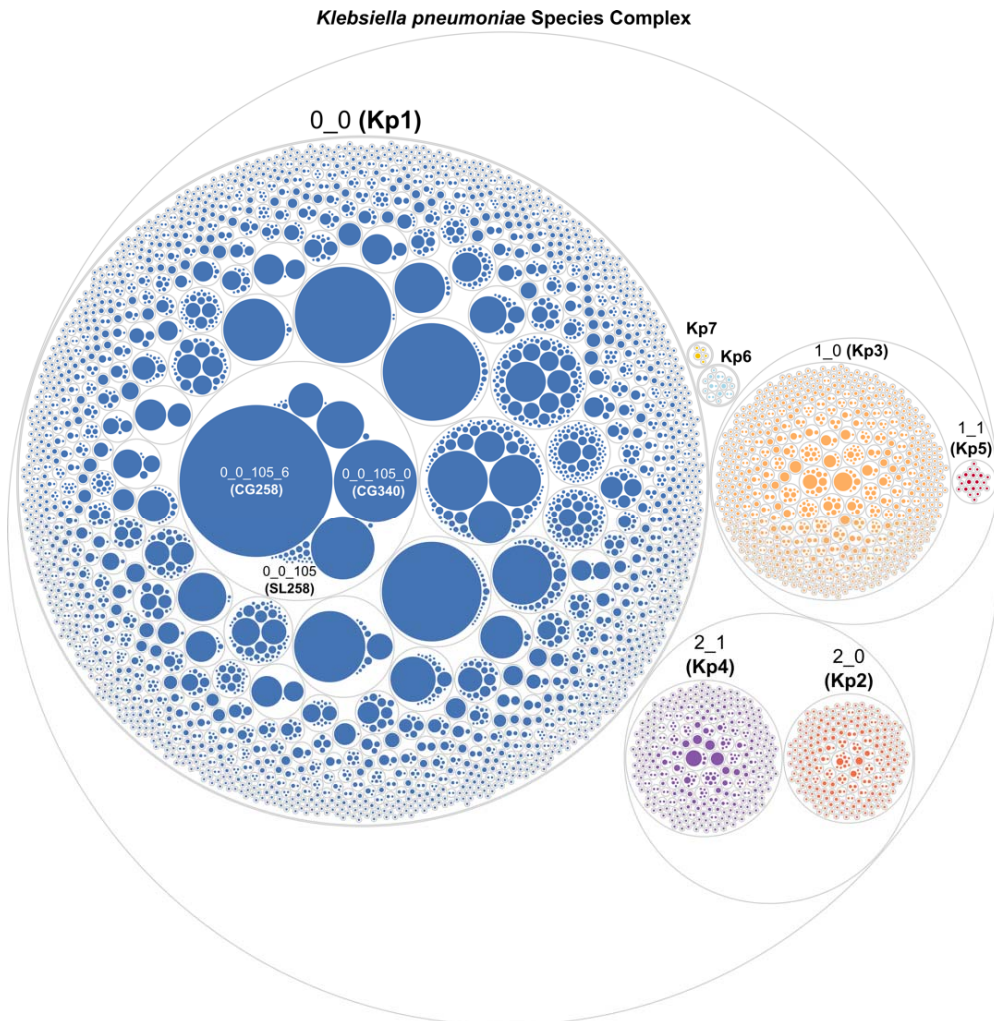



206 **Figure 2. The hierarchical nature of LIN code positions.** Numbering starts from 0 for subdividing  
207 each higher-level partition, characterized by a unique LIN code prefix. The hierarchical structure of  
208 LIN codes is shown here with a circular packing plot obtained from the KpSC data from BIGSdb-  
209 Pasteur. The circles correspond to LIN code prefixes of lengths 1 to 4 (an extra, all-encompassing  
210 circle corresponds to the entire KpSC); the size of the circles is related to the number of genomes they  
211 comprise. The first two bins in the LIN code prefix are used to identify phylogroups. Where for some  
212 phylogroups the first bin is unique (*e.g.*, prefix 0 for Kp1), in other cases it is common to multiple  
213 phylogroups (*e.g.*, prefix 2, which is associated with both Kp2 and Kp4), and therefore the second bin  
214 is necessary to discriminate between them (*e.g.*, 2\_0 and 2\_1 for Kp2 and Kp4, respectively). The  
215 hierarchical nature of LIN codes applies to subsequent levels of the prefix such as to those  
216 corresponding to sublineages (third bin, *e.g.* Kp1 SL258 is identified with the LIN code prefix  
217 0\_0\_105) and to clonal groups (fourth bin, *e.g.* Kp1 CG258 with the LIN code prefix 0\_0\_105\_6).  
218 Data was plotted in R v4.3.2 with ggplot2 and edited using Inkscape.

219

## 220 **Box 2. The particulars of LIN codes: handling of missing data, equal matches, input order and** 221 **computational precision**

222 **Missing data.** Whereas 7-gene MLST genotyping requires complete allelic profiles, cgMLST  
223 approaches can tolerate the presence of missing alleles, as some core genes may not be essential, and  
224 as genome assembly shortfalls occasionally result in the absence or incompleteness of some loci.  
225 Therefore, the definition of cgSTs needs to accommodate missing data. Profiles may differ only by  
226 loci where there is one or more missing allele(s) in one of the profiles, while otherwise identical at all  
227 loci called in both profiles. Such profiles will be assigned to distinct cgSTs. We define as coincident  
228 cgSTs, groups of cgST profiles that differ only by their missing data pattern. As the dissimilarity  
229 between profiles is computed based solely on loci called in both profiles (Hennart et al., 2022),  
230 coincident cgST profiles will have a 0 dissimilarity value between them, and therefore the same LIN  
231 code.

232 Near-identical isolates or different WGS runs of the same isolate can lead to variable missing allele  
233 calls but are otherwise identical in the called loci, and will as a consequence lead to the creation of two  
234 or more coincident cgSTs. Each of these isolates' profiles will match with these multiple coincident  
235 cgST. When a given profile matches two or more predefined coincident cgSTs, it will (by definition)  
236 be attributed to all the coincident cgSTs. To minimize this phenomenon, a maximum number of  
237 accepted missing data must be defined when implementing the cgST classification within BIGSdb.

238 **Equal matches and unicity of LIN codes.** As described above, an isolate's profile may match more  
239 than one encoded cgST, due to missing loci. In this case, a unique LIN code will be defined (and  
240 displayed) for the isolate. To choose between the different possibilities, the LIN code of the cgST with  
241 the fewest missing allele(s) will be attributed. When two or more coincident cgSTs have the same  
242 number of missing allele(s), the cgST with the smallest LIN code partition identifiers (considered from  
243 left to right bin, *i.e.*, the lowest sort order) will be chosen. The same priority rule is applied to encode

244 every novel profile that is equidistant to two (or more) previously LIN-encoded non-coincidental  
245 cgSTs.

246 **Input order.** The LIN code approach is dependent on input order, as the partition in a given bin may  
247 vary slightly according to the order by which the genomes were encoded (Hennart et al., 2022). To  
248 minimize this effect, BIGSdb uses the traversal of a minimum spanning tree (MStree; (Prim, 1957)) to  
249 define the order by which the novel profiles are encoded. To code a novel batch of genomes, after  
250 creating a MStree, the isolate chosen as the starting point for LIN encoding is the one that has the  
251 closest similarity to an already encoded isolate in the database; next, the MStree is traversed from this  
252 node. This approach (implemented since v1.36.1) maximizes reproducibility when adding a batch of  
253 novel genomes. To minimize the number of resulting prefix-based partitions, novel genomes should be  
254 encoded in batches as large as possible.

255 **Computational precision.** As for all categorizations that rely on thresholds, computational precision  
256 is critical for reproducible results. For example, the pairwise dissimilarity between cgMLST profiles,  
257 which is a ratio, may often have a higher number of decimals than can be handled by the computing  
258 system, and its rounded value may lead to a slight underestimate (or overestimate) of the true value.  
259 When the (true) dissimilarity between an incoming profile and its reference is exactly identical to the  
260 left threshold of a bin (*i.e.*, the same ratio of distinct versus called alleles), a rounded value may  
261 incorrectly correspond to the previous bin (**Figure 3**). Therefore, pairwise dissimilarity computations  
262 should be performed in a way exactly identical to the bin thresholds themselves. In BIGSdb, ratios  
263 corresponding to the thresholds are compared to the calculated dissimilarity values using Perl  
264 platform-native floating point values (usually IEEE 754 double-precision).

265

|          |                                 | Min. allelic difference (right threshold, exclusive):      |      |      |       |       |       |       |       |       |       |
|----------|---------------------------------|------------------------------------------------------------|------|------|-------|-------|-------|-------|-------|-------|-------|
|          |                                 | 610                                                        | 585  | 190  | 43    | 10    | 7     | 4     | 2     | 1     | 0     |
|          |                                 | Bins left thresholds (inclusive):                          |      |      |       |       |       |       |       |       |       |
|          |                                 | 0                                                          | 3.02 | 6.99 | 69.79 | 93.16 | 98.41 | 98.88 | 99.36 | 99.68 | 99.84 |
|          | Closest genome (similarity %)   |                                                            |      |      |       |       |       |       |       |       |       |
| Genome A | Initialization                  | 0                                                          | 0    | 0    | 0     | 0     | 0     | 0     | 0     | 0     | 0     |
| Genome B | A (3.50%)                       | 0                                                          | 1    | 0    | 0     | 0     | 0     | 0     | 0     | 0     | 0     |
| Genome C | B (99.0%)                       | 0                                                          | 1    | 0    | 0     | 0     | 0     | 1     | 0     | 0     | 0     |
| Genome D | B (7.00%)                       | 0                                                          | 1    | 1    | 0     | 0     | 0     | 0     | 0     | 0     | 0     |
| ...      | ...                             | ...                                                        |      |      |       |       |       |       |       |       |       |
|          |                                 | Similarity as truncated decimal number:                    |      |      |       |       |       |       |       |       |       |
| Genome X | D (99.3% ~ 625/629)             | 0                                                          | 1    | 1    | 0     | 0     | 0     | 1     | 0     | 0     | 0     |
|          |                                 | Similarity computed using same precision as the threshold: |      |      |       |       |       |       |       |       |       |
| Genome X | D (99.3640699523052% = 625/629) | 0                                                          | 1    | 1    | 0     | 0     | 0     | 0     | 1     | 0     | 0     |

266

267 **Figure 3. The effect of rounded cgMLST similarity values on LIN code assignment.** In this  
 268 example, the use of a rounded value for the similarity between genome X and genome D leads to a  
 269 slight underestimate, therefore creating a novel identifier in bin 7, instead of bin 8 when computing the  
 270 similarity with the same precision as the threshold.

271

### 272 LIN codes functionalities implemented within the BIGSdb platform

273 The LIN code taxonomy of KpSC genomes was incorporated into the Institut Pasteur *K. pneumoniae*  
 274 MLST and whole-genome MLST platform (<https://bigsdb.pasteur.fr/klebsiella>), using BIGSdb v1.34.0  
 275 and upwards (Hennart et al., 2022). For the KpSC, this database plays the role of the source database  
 276 for the definitions of alleles, cgMLST profiles, cgSTs, and LIN codes.

277 In BIGSdb, LIN code schemes can be defined in the curator's interface of both the 'sequence  
 278 definition' and 'isolates' databases. A LIN code taxonomy is created with reference to a defined  
 279 indexed scheme, e.g., cgMLST. An indexed scheme is a scheme with a unique identifier for each  
 280 profile, e.g., cgST here. To index a scheme, one needs to specify the maximum number of missing  
 281 alleles accepted for profiles to be assigned to cgSTs. To create a LIN code taxonomy, allele mismatch  
 282 thresholds that define the LIN code bins must simply be defined. In the case of KpSC, the 629-loci  
 283 cgMLST scheme was selected, and ten thresholds were defined (**Figure 1**).

284 Users who wish to assign a novel LIN code for a KpSC isolate must submit the genome sequence(s) to  
 285 the BIGSdb-Pasteur 'isolates and genomes' database. If all quality criteria are fulfilled

286 (<https://bigsd.b.pasteur.fr/klebsiella/genome-quality-check/>), the genome(s) will be deposited in the  
287 database for allele, cgMLST profile, cgST and LIN code definitions. The inferred cgMLST profiles, as  
288 well as their cgST identifiers and LIN codes, will be made openly accessible through the sequence and  
289 profile definition database ('seqdef'). To ensure confidentiality of users' data when requested, isolate  
290 metadata and associated genome sequence(s) can be embargoed and released at a later stage.

291 Users can search *K. pneumoniae* isolates of interest using the LIN code matching functionalities  
292 implemented in BIGSdb. A complete LIN code (or any prefix) can be used as a query. The nickname  
293 nomenclature attached to LIN code prefixes can also be used to facilitate the query of groups of  
294 interest (*e.g.*, SL258 members can be searched by using its attached prefix 0\_0\_105, or using the  
295 SL258 nickname itself). The list of genomes from the query results can be further analyzed using the  
296 available analytical tools within the BIGSdb platform, or exported for external use.

297

298

## 299 Section 2: Novel developments and examples of applications

### 300 Multiple *Klebsiella pneumoniae* 7-gene MLST sequence types are polyphyletic

301 Even though they are based on allelic profile comparisons rather than a sequence-based phylogenetic  
302 analysis, LIN code prefixes of length 3 or 4 bins are compatible with phylogenetic classifications and  
303 thus represent markers of their corresponding tree branches (Hennart et al., 2022). In contrast, 7-gene  
304 MLST may conflate phylogenetically unrelated genomes in a single ST, for example through  
305 recombination leading to the same ST being assigned to genomes from distinct parental lineages, or by  
306 large recombinations affecting multiple cgMLST loci but leaving the 7-gene MLST loci unaffected  
307 (Lam et al., 2023). Here we explore the extent of this phenomenon using 44,000 publicly available  
308 genomes of *K. pneumoniae* (June 2023). We found that 113 STs are polyphyletic, defined here as  
309 being observed in at least two unrelated LIN code sublineages (**Table S1**). We illustrate this  
310 phenomenon for major STs in **Figure 4**. For example, ST485 was observed in four phylogenetically  
311 unrelated sublineages: SL485 (0\_0\_157), SL45 (0\_0\_158), SL1626 (0\_0\_227) and SL11569  
312 (0\_0\_1215). ST347 stands out as being observed in 8 distinct sublineages. This analysis also  
313 confirmed the polyphyletic status of ST23 (Lam et al., 2023), which conflates isolates from distant  
314 sublineages: SL23 (0\_0\_429) and SL218 (0\_0\_115).

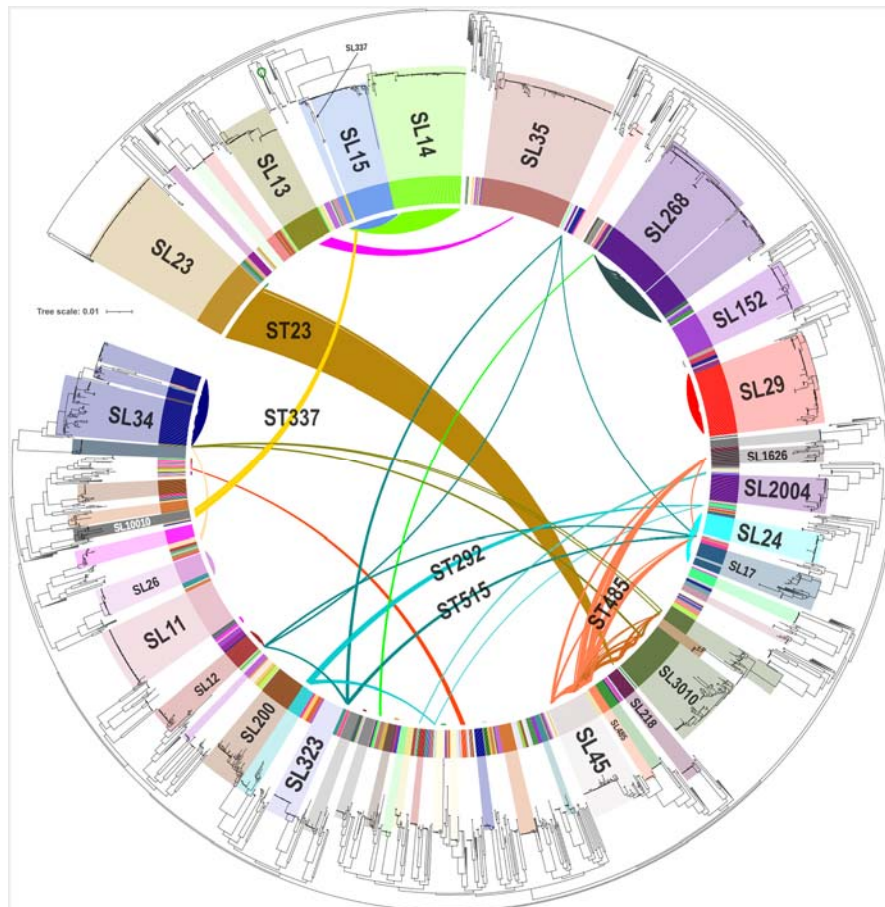

315

316 **Figure 4. Phylogenetic tree of *K. pneumoniae* main sublineages.** A phylogenetic analysis of 5,665  
317 *K. pneumoniae sensu stricto* genomes (LIN code prefix 0\_0; see selection process in Methods) was  
318 performed from the multiple sequence alignments of 629 cgMLST genes. Closely related leaves were  
319 collapsed. The colored sectors in the inner circle correspond to the sublineages (SL) defined based on  
320 their prefix of length 3 (*i.e.*, made of the three first bins); the major sublineages are highlighted by  
321 lighter-colored sectors joining the circle to the tree leaves. The internal connectors between  
322 sublineages represent frequent STs that were found in two or more sublineages. The full interactive  
323 tree is available at: <https://itol.embl.de/tree/1579917420525181688029926>

324

325 **Nicknaming the LIN code prefixes enables carry-over of MLST identifiers into the genomic**  
326 **taxonomy**

327 Whereas LIN code prefixes themselves can be used as canonical markers of groups of interest that are  
328 easy to handle by computers, for humans, prefixes are not very easy to remember or pronounce. Here,  
329 we propose to nickname the LIN code prefixes with simple denominations using a LIN code prefix  
330 nicknaming system (newly implemented within BIGSdb;  
331 [https://bigsdb.readthedocs.io/en/latest/administration.html?highlight=prefix#setting-up-lincode-](https://bigsdb.readthedocs.io/en/latest/administration.html?highlight=prefix#setting-up-lincode-definitions-for-cgmlst-schemes)  
332 [definitions-for-cgmlst-schemes](https://bigsdb.readthedocs.io/en/latest/administration.html?highlight=prefix#setting-up-lincode-definitions-for-cgmlst-schemes)). It is thereby possible to nickname every prefix in any chosen way,  
333 for example by incrementing an integer identifier for each novel prefix of a given length, analogous to  
334 the numbering of 7-gene MLST STs. Other labels could be applied, such as Greek letters,  
335 astronomical objects, or any other series of words that may be universally understandable and easy to  
336 remember. This nicknaming process would be particularly useful for long prefixes, or prefixes of  
337 particular relevance that subdivide the population at particularly informative levels.

338 For bacterial species where previous nomenclatures exist, a novel and unrelated naming system would  
339 have the drawback of creating yet another nomenclature. Assigning nicknames to prefixes based on  
340 the previous nomenclature system is therefore more meaningful. For *K. pneumoniae*, the classical  
341 MLST nomenclature system is widely used, and knowledge has accumulated on the epidemiological  
342 history and characteristics of predominant STs. We therefore aimed to create backward nomenclatural  
343 compatibility of LIN codes with ST identifiers. We used a majority identifier inheritance rule that was  
344 previously developed and applied to single-linkage cgMLST groups (Hennart et al., 2022). We applied  
345 this approach to nickname LIN code prefixes of lengths 3 and 4 bins (which, for convenience, we have  
346 defined as sublineages and clonal groups, respectively) by using ST identifiers as a source. In short,  
347 for each LIN code prefix of length 3 or 4 bins, the identifier of the predominant ST among its genomes  
348 was used as a label, wherever possible (*i.e.*, if not yet attributed). Following this approach, most SLs  
349 and CGs were indeed labeled according to the ST identifiers of most of their isolates, whereas a  
350 minority are nicknamed with incremental numbers (because the majority ST was already used for  
351 another prefix). In **Figure 5**, we provide illustrative examples of correspondence between prefixes and  
352 nicknames for major clonal groups. For example, ST258, and its derivative ST512, share the prefix  
353 0\_0\_105, nicknamed SL258, and the 4-positions prefix 0\_0\_105\_6, nicknamed CG258.

354

| LIN prefix | Phylo-group | LIN prefix | Main ST | Nickname | LIN prefix | Main ST | Nickname |
|------------|-------------|------------|---------|----------|------------|---------|----------|
| 0_0        | Kp1         | 0_0_0      | 15      | SL15     | 0_0_105_6  | 258     | CG258    |
| 1_0        | Kp3         | 0_0_429    | 23      | SL23     | 0_0_105_0  | 340     | CG340    |
| 1_1        | Kp5         | 0_0_105    | 258     | SL258    | 0_0_105_2  | 11      | CG11     |
| 2_0        | Kp2         | 0_0_158    | 45      | SL45     | 0_0_105_11 | 11      | CG3666   |
| 2_1        | Kp4         | 0_0_197    | 147     | SL147    | 0_0_105_1  | 437     | GC10268  |
| 3_0        | Kp6         | 0_0_369    | 307     | SL307    | 0_0_105_29 | 11      | CG12811  |
| 4_0        | Kp7         | 0_0_750    | 6589    | SL10691  | 0_0_105_7  | 895     | CG895    |

355

356 **Figure 5. Nicknaming of LIN code prefixes enables inheritance of previous nomenclatures.**  
357 Nicknames of some LIN code prefixes of lengths 2 to 4 bins, inherited from phylogroup numbering or  
358 Linnaean taxonomy (2-bin prefix, left panel) or 7-gene MLST (prefixes of lengths 3 and 4 bins, central  
359 and right panels), are displayed.

360

361 Note that the MLST nickname inheritance rule was applied only using ST identifiers up to ST6500  
362 (**Figure S1**). Given that the main sublineages of KpSC have long been sampled, the inheritance of  
363 MLST identifiers on SL and CG identifiers will apply to most of the extant diversity of the KpSC. For  
364 subsequent prefixes, SL and CG nicknames are numbered incrementally, starting with 10,000 (see  
365 example on **Figure 5**) in order to make clear that these new nicknames are not inherited from MLST  
366 nomenclature. In parallel, continual expansion of the MLST nomenclature will result in defining STs  
367 (incremented by one) upwards of 6500 (currently the highest ST is ST6859, January 21<sup>st</sup>, 2024).  
368 Hence, a correspondence between ST identifiers >6500 and prefix nicknames >10,000 may exist but  
369 will not be immediately obvious. For novel sublineages and clonal groups that may emerge in the  
370 future, our recommendation is to prioritize their LIN code SL and CG nicknames, rather than their ST,  
371 when communicating on these groups. Note that the 2-bin prefixes of *Klebsiella* LIN codes each  
372 define a particular KpSC phylogroup, corresponding to the seven currently described species or  
373 subspecies (Hennart et al., 2022), and were thus nicknamed accordingly (**Figure 5**).

374

### 375 **From dual- to single-barcoding taxonomy of *Klebsiella pneumoniae* strains**

376 Previously, cgMLST groups were defined by the single-linkage (slink) clustering method using the  
377 same 10 thresholds as for the LIN codes, and the four highest-level groups were nicknamed by  
378 inheritance from Linnaean taxon names (for the two first) or MLST labels (for the levels defined by  
379 thresholds 190 and 43, dubbed Sublineage and Clonal Groups, respectively) (Hennart et al., 2022).  
380 Together with the LIN code taxonomy (which had no nickname in (Hennart et al., 2022)), this slink-  
381 based system formed a ‘dual-barcoding approach’. However, because such slink groups suffered from

382 fusion of existing groups upon addition of subsequent genotypes, which occasionally had intermediate  
383 distances between preexisting groups (*e.g.*, hybrid genotypes), the classification of cgMLST profiles  
384 into slink groups was abandoned. Fortunately, when excluding the hybrid genotypes, a nearly  
385 complete concordance was observed at the four first levels between slink clusters and LIN code  
386 groupings optimized based on MStree (Hennart et al., 2022). As a result, the LIN code taxonomy  
387 currently in use is nearly fully consistent with the one initially proposed (only SL10000 to SL10021,  
388 and CG10000 to CG10276 correspond to groups that were renamed; table of correspondence available  
389 upon request). The use of a single-barcoding taxonomic system based on LIN codes will stabilize and  
390 simplify the way groups are defined and labeled.

391

### 392 **LIN code taxonomy usage in external genomic epidemiology platforms**

393 To make the LIN code taxonomy accessible for external tools, databases and analysis platforms, the  
394 LIN code nomenclature components (alleles, profiles, cgSTs and LIN codes) can be extracted from  
395 BIGSdb using an application programming interface (Jolley et al., 2017). This can be performed via a  
396 single query using the following link:  
397 [https://bigsdb.pasteur.fr/api/db/pubmlst\\_klebsiella\\_seqdef/schemes/18/profiles\\_csv](https://bigsdb.pasteur.fr/api/db/pubmlst_klebsiella_seqdef/schemes/18/profiles_csv). However it is  
398 important to note that to be effective, external copies of the database need to be very frequently  
399 synchronized with the primary nomenclature database. This is because, when genome sequences  
400 (through their cgMLST profiles) are matched to the LIN code taxonomy, an incomplete LIN code may  
401 be defined in many cases, as no identical cgMLST profile may be existing at this time in the source  
402 LIN code taxonomy. In such cases, a new nomenclatural identifier must be defined and assigned, but  
403 this is only possible within the source database otherwise consistency of nomenclature will be lost.  
404 Inference of the query genome's LIN code in external resources can only be inferred up to the bin  
405 preceding the pivot bin corresponding to the closest match. Notably though, when the LIN code prefix  
406 up to the fourth bin (at least) can be defined for the query genome, information on species, subspecies,  
407 SL and CG can be derived. If the query genome is closely related to one in the source database, its  
408 LIN code will be almost completely defined. Therefore, although novel cgMLST alleles, cgST profiles  
409 and LIN codes can only be defined in the source database of the nomenclature (BIGSdb-Pasteur for  
410 the KpSC), the use of LIN codes in external databases or tools still has functional relevance. For any  
411 genome (cgMLST profile) that has no complete LIN code, data submission to the source database is  
412 encouraged, in order to update the LIN code taxonomy and define complete LIN codes for the novel  
413 genomes.

414 To illustrate the external use of LIN codes, we implemented the KpSC LIN code taxonomy in the  
415 Pathogenwatch platform, in which a KpSC database was set-up previously (Argimón et al., 2021).  
416 First, on a regular basis, Pathogenwatch synchronizes from BIGSdb into its internal temporary



417 database, the defined alleles, cgSTs and associated LIN codes, using the API functionality of BIGSdb.  
418 Second, the cgMLST allele sequences extracted from the query genome assembly are compared to  
419 those in the temporary database, and the cgMLST profile is used to find the closest match in the  
420 temporary database. If the query genome does not match completely with an existing source  
421 nomenclature cgST, a provisional cgST is assigned, represented by the asterisk and a code (*e.g.*, cgST  
422 \*f26e). Pathogenwatch also indicates the closest cgST defined in the source taxonomy database and  
423 provides a link to the list of all isolates within Pathogenwatch that have the same cgST genotype.  
424 Third, an incomplete LIN code will be provided by Pathogenwatch based on the shared prefix with the  
425 closest reference cgST (**Figure 6**). This process provides information about the relatedness of a query  
426 Pathogenwatch genome compared to the existing taxonomy elements and can in most cases provide  
427 sublineage and clonal group identification. In those cases where Pathogenwatch provides provisional  
428 alleles, STs, cgSTs and/or LIN codes, the user is encouraged to submit the genomic sequence data to  
429 the source BIGSdb-Pasteur database so that novel nomenclatural identifiers (alleles, STs, cgSTs, LIN  
430 codes) can be created. Note that as Pathogenwatch uses its own algorithm to provide the species and  
431 subspecies for KpSC genomes, this taxonomic information is not deduced from LIN codes in that  
432 platform.

433

### cgMLST classification - Core genome MLST profile comparison

[Sourced from the Pasteur Institute.](#)

| Sublineage                | Clonal group            | LIN code             |
|---------------------------|-------------------------|----------------------|
| 258                       | 258                     | 0_0_105_6_0_**_**_** |
| Core genome sequence type | Closest defined cgST(s) | Identity             |
| *f26e                     | 823                     | 99.2026% (622/627)   |

434 [View all cgST \\*f26e](#) 

435

436 **Figure 6. Example of LIN code identification in Pathogenwatch.** Although the LIN code is  
437 incomplete, the genome can be inferred to belong to clonal group 258 (defined as prefix 0\_0\_105\_6),  
438 which comprises ST258 and ST512 isolates (see **Figure 7**).

439

### 440 Applications of LIN codes to subdivisions within high-risk Kp sublineages

441 A number of *K. pneumoniae* sublineages, including SL258, SL147, SL307, SL17 and SL23, have been  
442 recognized to cause a large burden of so-called hypervirulent or multidrug resistant infections. These  
443 groups have been the subject of detailed studies, that have led to defining their geographical spread  
444 and phylogenetic subgroups (Deleo et al., 2014; Hetland et al., 2023; Lam et al., 2018; Rodrigues et

445 al., 2022; Wyres et al., 2019). However, so far, a harmonized nomenclature of these subgroups has  
446 been lacking, making it difficult to recognize them in subsequent studies. Here, we illustrate how LIN  
447 codes can help track Kp dissemination at fine genetic scales within sublineages, using the example of  
448 SL258, a major *Klebsiella pneumoniae* carbapenemase (KPC) producing sublineage of *K.*  
449 *pneumoniae*.

450 SL258 is defined by its LIN code prefix, 0\_0\_105, and encompasses all isolates from 7-gene ST11,  
451 ST258, ST340, ST512 and some others (**Figure 5**). Its phylogenetic structure shows that SL258 is  
452 divided into several clades (**Figure 7**) that are labeled with their unique clonal group number. These  
453 include CG258 (0\_0\_105\_6), defined by LIN code position 4, which contains all ST258 and ST512  
454 isolates. LIN code position 5 can further be used to distinguish major subclades within SL258,  
455 including ST340 (0\_0\_105\_0\_11) and ST437 (0\_0\_105\_1\_1) and other subclades within ST11, some  
456 of which appear to be associated with recombination events that include the capsule locus (KL column  
457 in **Figure 7**). The LIN codes can also help distinguish between different subclades that are associated  
458 with the same capsule locus. For example, they clearly distinguish 3 subclades that are all ST11-KL64  
459 (grey shading on the tree branches, **Figure 7**). One of these is the major lineage circulating in China  
460 (0\_0\_105\_2\_0\_0\_2, predominantly 0\_0\_105\_2\_0\_0\_2\_17, 24/30 genomes) that carries KPC-2 and  
461 often the *iuc1* aerobactin virulence locus, descended from ST11-KL47-KPC-2 (0\_0\_105\_2\_0\_0\_2\_\*,  
462 where \* is not 17), as discussed broadly in the literature (Zhou et al., 2023, 2020). A second, unrelated  
463 ST11 subclade carrying KL64 (0\_0\_105\_0\_0) is circulating in South America (encoding KPC-2, but  
464 rarely *iuc*), while a third smaller clade (0\_0\_105\_0\_2) is detected primarily in Taiwan rather than in  
465 mainland China (lacking KPC and with only one of eight genomes carrying *iuc*). The example of  
466 SL258 illustrates how LIN code classification beneath the sublineage level can help recognize and  
467 name subgroups of medical and epidemiological relevance, which should be the object of enhanced  
468 surveillance.

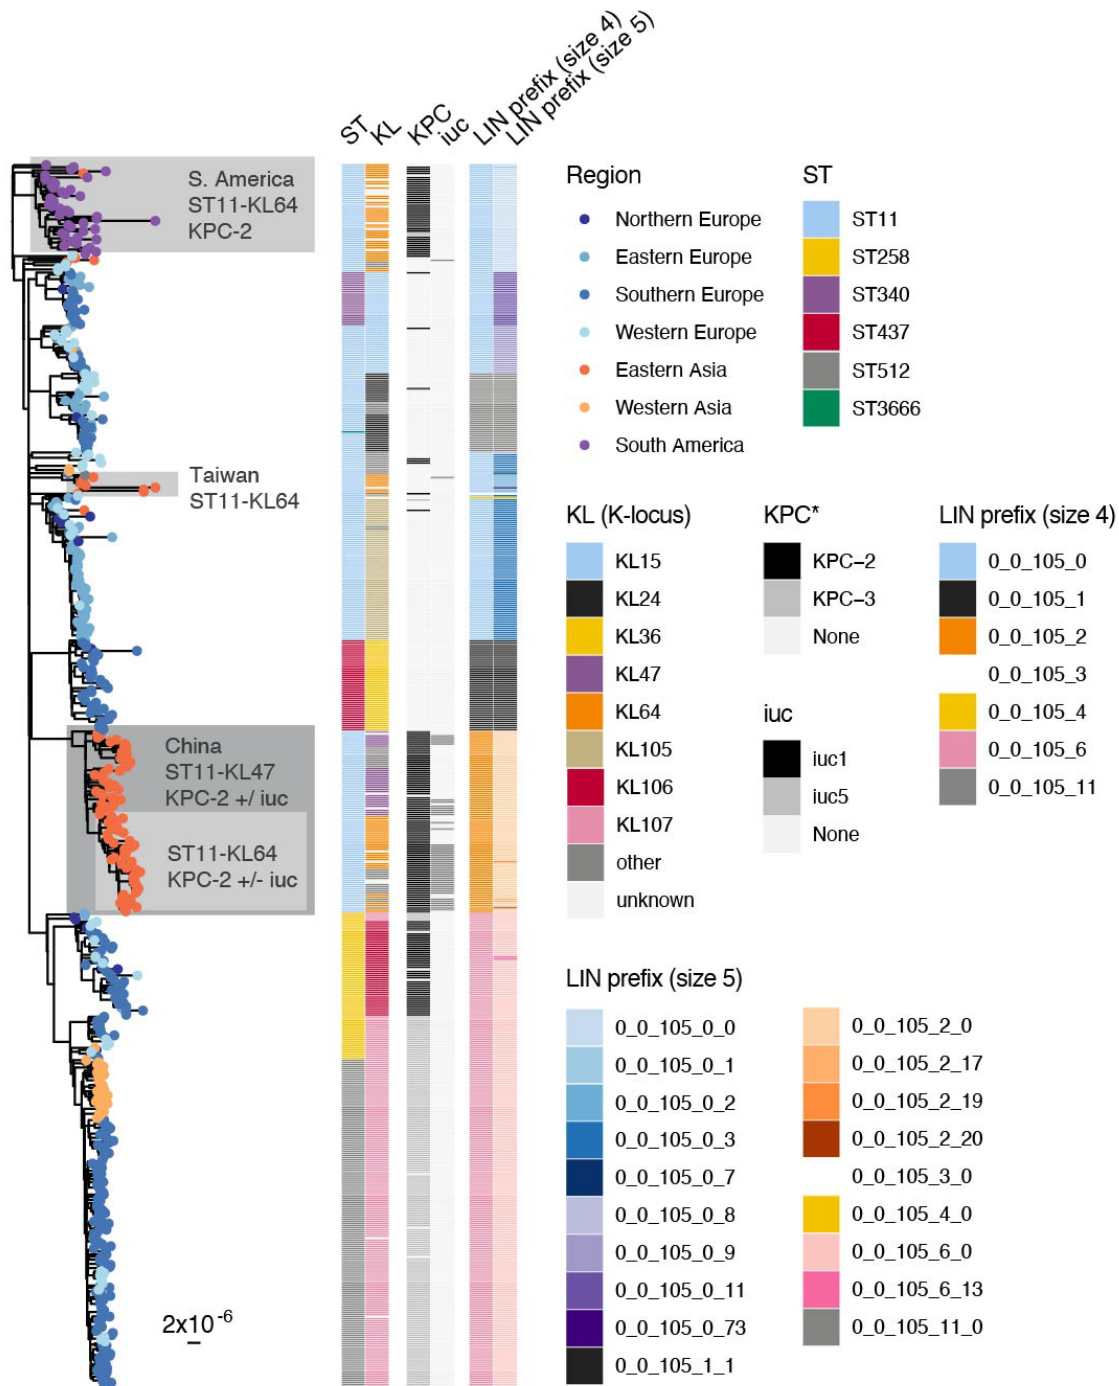

469

470 **Figure 7. SL258 phylogenetic structure and LIN codes.** Maximum-likelihood phylogenetic tree of  
 471 n=586 SL258 genomes inferred from a recombination-free variable site alignment (see Methods). Tips  
 472 are coloured to indicate geographic region of origin as per the legend (United Nations region  
 473 classifications). The distribution of 7-gene sequence types (STs), K-loci (KL), *bla<sub>KPC</sub>* (KPC) alleles,  
 474 aerobactin locus lineages (*iuc*), LIN code prefixes of sizes 4 and 5, are indicated by colored blocks as  
 475 per the legends (note that colors are independent to each column). Only K-loci identified with a  
 476 Kaptive confidence score of ‘Good’ or better are shown (otherwise marked ‘unknown’). Two isolates  
 477 were detected with *bla<sub>KPC-30</sub>* and one with *bla<sub>KPC-12</sub>* but are not shown in the figure for brevity. Sub-  
 478 clades described in the text are coloured and labeled accordingly.

479

## 480 **Application of LIN codes to outbreak strain identification**

481 To illustrate the use of LIN codes to identify outbreak strains, and to track strain diversification during  
482 protracted outbreaks, we explored the example of SL147. This is a prominent multidrug-resistant  
483 international sublineage of *K. pneumoniae*, defined by its LIN code prefix 0\_0\_197. **Figure S2**  
484 illustrates how the phylogenetic relationships within SL147 are captured by LIN codes, using a  
485 previously described dataset (Rodrigues et al., 2022). SL147 comprises a single clonal group  
486 (0\_0\_197\_0) and three 7-gene STs (ST147, ST273 and ST392). At LIN code position 5, four partitions  
487 (0\_0\_197\_0\_0, 0\_0\_197\_0\_4, 0\_0\_197\_0\_17 and 0\_0\_197\_0\_25) correspond largely to ST273,  
488 ST392 and two deep branches of ST147. In addition, both ST147 and ST273 are genetically  
489 heterogeneous and structured phylogenetically into several minor branches, which were captured by  
490 additional partitions of LIN code level 5 (**Figure S2, panel A**).

491 Protracted outbreaks often lead their investigators to define local clades (or subgroups) within the  
492 closely related outbreak isolates. These clades are often attributed temporary placeholder names,  
493 which are difficult to compare across studies *e.g.*, Clade A and Clade B (Martin et al., 2021). We  
494 illustrate how LIN codes provide a way to define these clades definitively, using the diversity among  
495 outbreak isolates from a metallo- $\beta$ -lactamase (NDM)-producing carbapenem-resistant ST147 outbreak  
496 in Tuscany (**Figure S2, panel B; Table S2**). The time span of the Tuscany outbreak is November  
497 2018 - 2021. Most of the isolates in this outbreak have prefix 0\_0\_197\_0\_4\_1\_0, thus differing by no  
498 more than 4 alleles out of 629 with another member of the group. The authors defined two clades, A  
499 and B. Here, clade B corresponds to the set of LIN codes 0\_0\_197\_0\_4\_1\_0\_8\_x\_x (*i.e.*, with prefix  
500 0\_0\_197\_0\_4\_1\_0\_8, with x meaning there may be variation at the two last positions). Clade A was  
501 more diverse, and LIN codes classify this genetic variability in a definitive way, with six 8<sup>th</sup> position  
502 prefixes (0\_0\_197\_0\_4\_1\_0\_7, 0\_0\_197\_0\_4\_1\_0\_9, 0\_0\_197\_0\_4\_1\_0\_10, 0\_0\_197\_0\_4\_1\_0\_11,  
503 0\_0\_197\_0\_4\_1\_0\_12 and 0\_0\_197\_0\_4\_1\_0\_66). This example highlights how *K. pneumoniae* LIN  
504 codes can subdivide isolates from long-term outbreaks.

505 A search of the BIGSdb-Pasteur KpSC database (January 31<sup>st</sup>, 2024) for prefix 0\_0\_197\_0\_4\_1\_0  
506 identified n=395 *K. pneumoniae* genomes, isolated between 2014 and 2023 and coming from 20  
507 countries from North America, Europe, Asia, Africa and Oceania, which indicate the global  
508 dissemination of this particular subgroup of SL147. However, prefix 0\_0\_197\_0\_4\_1\_0\_8 was so far  
509 only reported from the Italian outbreak. This example illustrates how LIN codes can facilitate the  
510 tracking of strain dissemination, by enabling the identification of similar isolates from separate  
511 studies. As an outbreak strain prefix can be easily discussed and shared among investigators and is  
512 sufficient to exchange information on strain identity across countries, LIN codes enable genomic  
513 surveillance investigations without the need to share genomic sequences, which may alleviate issues

514 around data confidentiality. Likewise, for the surveillance of particularly concerning strains, early  
515 warnings could be triggered based on the detection of the specific LIN code of the strains under  
516 surveillance.

517 Given that LIN codes are phylogenetically informative, they can be represented graphically as prefix  
518 trees, which broadly approximate the phylogenetic relationships among isolates (Hennart et al., 2022).  
519 Here, we introduce the tool LINtree to create prefix trees from LIN codes  
520 (<https://gitlab.pasteur.fr/GIPhy/LINtree>). The input file contains a list of genome names and LIN  
521 codes (one sample per row), with a header row indicating the level of similarity for each bin. LINtree  
522 outputs a Newick-formatted tree showing the relationships between input genomes, based on the  
523 hierarchy provided by the LIN codes and with branch lengths scaled using the similarity levels in the  
524 header row. For example, the tree of the ST147 Italian outbreak shown in **Figure S2** was generated  
525 using this tool, based on the input list of LIN codes. This example illustrates how the prefix tree  
526 recapitulates the phylogenetic relationships of this outbreak strain with its ancestral relatives,  
527 providing a useful aid in outbreak investigations.

528

## 529 **Discussion**

530 Facilitating communication on the intraspecific diversity of bacterial strains is a key objective of strain  
531 taxonomies, which entail classification and naming of groups within species. In the field of  
532 epidemiological surveillance of pathogens, it has long been recognized that strain typing methods used  
533 for long-term and global strain tracking should rely on an internationally standardized nomenclature  
534 (Struelens, 1998). In turn, a robust and fine-grained strain taxonomy promotes the understanding of  
535 the links between genotypes and clinical phenotypes, vaccine coverage and antimicrobial resistance  
536 (Achtman et al., 2022; Maiden et al., 2013).

537 Here we have presented in detail the cgMLST-based LIN code approach and further developed this  
538 novel strain taxonomy system. The stability of LIN code classification is a critical property, which has  
539 been impossible to achieve with previous strain classification systems relying on single-linkage  
540 clustering (such as MLST clonal complexes defined by BURST or cgMLST single-linkage groups).  
541 cgMLST LIN codes are stable, as the incorporation of novel genomes has no effect on pre-existing  
542 LIN codes (**Figure 1**). Here, we have presented important enhancements of our initial implementation,  
543 by (i) improving the reproducibility of LIN encoding by addressing the dependency of this approach to  
544 rounded genetic distance values; (ii) the implementation within the BIGSdb platform, of input order  
545 rules for creating novel LIN codes, and (iii) implementing formal rules for handling missing data.  
546 These improvements optimize the definition of LIN codes and have resulted in a robust strain  
547 taxonomy system that is now in operation for *K. pneumoniae* since January 2023 and currently

548 comprises 37,070 cgSTs and 32,500 LIN codes, which correspond to 2,492 sublineages and 4,230  
549 clonal groups (January 28<sup>th</sup>, 2024).

550 In this work, we also extend the LIN code approach by proposing and implementing a nicknaming  
551 system for LIN code prefixes. As shown previously (Hennart et al., 2022; Marakeby et al., 2014), LIN  
552 codes are highly compatible with phylogenetic relationships, and their prefixes can therefore act as  
553 markers of phylogenetic groups. Nicknaming was designed to be flexible, and can thus accommodate  
554 any naming system of choice, either numerical or textual. To ensure continuity with 7-gene MLST  
555 nomenclature, we had previously proposed to nickname cgMLST single-linkage groups (Hennart et  
556 al., 2022). For *K. pneumoniae*, we had nicknamed the partitions within two special levels with  
557 thresholds of 43 and 190 mismatches, defined as “sublineages” and “clonal groups”, respectively.  
558 However, because of the instability of the single-linkage clustering approach, we soon observed  
559 fusions of previously defined (and nicknamed) groups, rendering the single-linkage-based  
560 nomenclature unstable. Here, we instead nickname the LIN code prefixes of lengths 3 and 4 bins,  
561 which correspond to the same thresholds as previously defined “sublineages” and “clonal groups”,  
562 respectively. Hence, we here redefined the “sublineages” and “clonal groups” as being based on LIN  
563 code prefixes.

564 A key property of a novel nomenclature system is its continuity with previous nomenclatures, as it  
565 minimizes confusion and facilitates its adoption by microbiologists and epidemiologists. Establishing  
566 a dictionary of correspondence between novel and previous nomenclatures is a possibility but it  
567 implies cumbersome handling of both series of identifiers. Here, we provide the possibility of  
568 embedding any previous nomenclature(s) within the LIN code taxonomy. In the case of *K.*  
569 *pneumoniae*, by using a previously described inheritance algorithm (Hennart et al., 2022) that has  
570 mapped the 7-gene ST identifiers onto LIN code prefixes of lengths 3 and 4 bins, we provide  
571 continuity between the novel nomenclature of sublineages and clonal groups with the widely used  
572 MLST standard. Using LIN code prefix nicknames instead of MLST identifiers has the additional  
573 benefit of enhancing the compatibility of the nomenclature with phylogenetic relationships: we have  
574 shown here for *K. pneumoniae* that classical MLST profiles often conflate unrelated sublineages. Note  
575 that we still recommend the maintenance and extension of the MLST nomenclature to classify future  
576 *K. pneumoniae* isolates, in parallel to the novel genomic nomenclature. However, we suggest the  
577 prioritization of LIN code nomenclature over MLST, which will be particularly important for  
578 sublineage and clonal group designations above 10,000 that are not inherited from MLST.

579 Hierarchical clustering (HierCC) also provides stable classifications and is likewise implemented  
580 based on cgMLST schemes (Zhou et al., 2021). Unlike for LIN codes, HierCC partition identifiers are  
581 incremented independently across levels, necessitating the handling of large integers, particularly in  
582 bins corresponding to the highest similarities, where over 100,000 partitions might be created. In

583 contrast, LIN codes re-initiate the numbering from 0 within a bin, for each subdivision of a partition in  
584 the upper bin, resulting in a predominance of small integers, which are easier to handle for humans. By  
585 design, HierCC is stable only in its production mode, whereas it relies on the unstable single-linkage  
586 clustering approach in its development mode, implying an arbitrary decision on the switch from  
587 development to production to achieve stability.

588 LIN codes, as well as HierCC, are multilevel classifications that provide proxies of strain  
589 relationships. By conveying for each genome, its group membership and approximate degree of  
590 relatedness at various phylogenetic depths simultaneously, they are phylogenetically informative. LIN  
591 code prefixes are shared by genomes having at least the identity corresponding to the upper threshold  
592 of the last prefix bin (exclusive). The LIN codes (or HierCC codes) can in fact themselves be  
593 represented as a tree (formally, a prefix tree), with multifurcations corresponding to subdivisions of  
594 each prefix (**Figure S2, panel C**; see also (Hennart et al., 2022)) and node height corresponding to bin  
595 thresholds. This tree representation of LIN codes may serve as a proxy for the phylogenetic tree and  
596 can be created with no need of initial sequences or cgMLST profiles.

597 A taxonomic system needs to be created and updated in a coordinated manner. For this purpose, the  
598 cgMLST LIN code strain taxonomy approach was implemented in the BIGSdb platform. Its  
599 integration in this widely used platform will make it publicly available, and will facilitate its  
600 implementation for other bacterial species, as was recently illustrated for *Streptococcus pneumoniae*  
601 (Brueggemann *et al.* bioRxiv 2023, doi: <https://doi.org/10.1101/2023.12.19.571883>). The applicability  
602 to other bacterial species should be straightforward, provided that they comprise meaningful cgMLST  
603 diversity, excluding the so-called monomorphic pathogens (Achtman, 2008), such as *Mycobacterium*  
604 *tuberculosis* or *Salmonella enterica* serotype Typhi. Setting up LIN codes for other species will  
605 require defining tailored bin thresholds based on population structures, which requires globally  
606 representative genome datasets (**Figure S3, overview chart**). The approach could also be extended  
607 with minor adaptations to other organisms with predominantly clonal reproduction, such as protozoan  
608 parasites and fungi, even if they are not haploid (Bougnoux et al., 2004; Yeo et al., 2011). The wide  
609 adoption of the standardized cgMLST LIN code strain taxonomy would result in a universal strain  
610 nomenclature approach that could greatly enhance microbial biodiversity studies, international  
611 genomic epidemiology and infectious disease surveillance.

612

613

## 614 **Methods**

### 615 **Identification of MLST sequence types that are discordant with sublineage classification**

616 We used the 44,000 public genomes available in BIGSdb in June 2023. To spot potential discordances  
617 between ST and LIN code prefixes, we first filtered out non-Kp1 phylogroup (prefix 0\_0) genomes  
618 and removed nearly identical cgMLST profiles, by keeping a single representative of each partition at  
619 LIN code bin 5. STs observed only in a single isolate were filtered out. We next searched for all STs  
620 that were split in several clonal groups or sublineages (as defined by their prefix) and conversely, also  
621 looked for prefixes of length 3 or 4 which comprised several STs. We then placed these genomes in a  
622 phylogenetic tree built using IQtree v2.2.2.2 (Minh et al., 2020) using GTR+I+G model, from  
623 concatenated alignments of individual cgMLST gene alignments.

624

### 625 **SL258 phylogeny**

626 Whole genome sequences representing SL258 were identified among the EuSCAPE collection (David  
627 et al., 2019) and two recent studies reporting 7-gene ST11 with K-locus (KL) 47 and KL64, for which  
628 multiple independent evolutions have been reported (Wang et al., 2023; Zhou et al., 2023). The ST11  
629 genomes were subsampled to a manageable number as follows: (i) five randomly selected genomes  
630 per study year for each of ST11-KL47 and ST11-KL64 reported from sites across China, plus all ST11  
631 with other K-loci reported in the same study included for context, total 92 genomes from this study  
632 (Zhou et al., 2023); (ii) 64 genomes representing ST11-KL64 clade 1 as defined in an analysis of  
633 public ST11-KL64 genomes (Wang et al., 2023). Genome assemblies were acquired from  
634 Pathogenwatch and those with >500 contigs and/or total assembly size < 4,969,898 or > 6,132,846 bp  
635 were removed (as per the KlebNET-GSP quality control definitions). Kleborate v2.3.2 (Lam et al.,  
636 2021) was used to determine 7-gene ST, *bla<sub>KPC</sub>* alleles, and *iuc* lineages (aerobactin locus), and  
637 Kaptive v2.0.7 (Lam et al., 2022; Wyres et al., 2016) was used to identify KVs.

638 In order to infer a high-resolution phylogenetic tree, genome assemblies were used to simulate 100bp  
639 paired end reads with wgsim (without errors, <https://github.com/lh3/wgsim>). Reads were mapped  
640 against the NJST258-1 completed reference genome (NCBI accession: CP006923.1) and single  
641 nucleotide variants called using the RedDog pipeline (<https://github.com/katholt/RedDog>). The  
642 resultant allele table was converted to a pseudo-whole genome alignment and used as input for  
643 Gubbins v2.3.2 (Croucher et al., 2015), in order to detect and remove recombination (100 iterations).  
644 The final filtered alignment of 10,390 variable sites, representing 591 genomes, was used to infer a  
645 maximum likelihood (ML) phylogenetic tree using RAxML v8.2.9 with parameters: best of 5 runs,  
646 1,000 bootstraps each, gamma model of rate variation (Stamatakis, 2014). Subsequently, five genomes  
647 were removed due to excessive branch lengths. The ML tree was visualized with R v4.3.1 and the



648 following packages: ape v5.7.1 (Paradis et al., 2004), phytools v 1.9-16 (Revell, 2024), and ggtree v  
649 3.8.2 (Yu et al., 2017).

650

### 651 **Data availability**

652 There are currently 39,506 genomic sequences publicly available in BIGSdb. Genomes can be  
653 downloaded from the sequence bin page, and LIN codes are available in the main table retrieved  
654 following an isolates search page results. The complete and up-to-date LIN code nomenclature  
655 (comprising alleles, profiles, cgSTs and LIN codes) can be extracted from BIGSdb using a single  
656 query at the following link:  
657 [https://bigssdb.pasteur.fr/api/db/pubmlst\\_klebsiella\\_seqdef/schemes/18/profiles\\_csv](https://bigssdb.pasteur.fr/api/db/pubmlst_klebsiella_seqdef/schemes/18/profiles_csv).

### 658 **Acknowledgements**

659 We thank François Lebreton for providing the Newick file of the Italian ST147 outbreak described in  
660 Martin *et al.*, 2021. We acknowledge the help of the HPC Core Facility of the Institut Pasteur for this  
661 work.

### 662 **Funding**

663 This work was supported, in whole or in part, by the Bill & Melinda Gates Foundation [INV-025280],  
664 Institut Pasteur and by European Union's Horizon 2020 research and innovation programme. This  
665 work was also supported financially by the French Government's Investissement d'Avenir program  
666 Laboratoire d'Excellence "Integrative Biology of Emerging Infectious Diseases" (ANR-10-LABX-62-  
667 IBEID). BIGSdb development is funded by a Wellcome Trust Biomedical Resource grant  
668 (218205/Z/19/Z).

669 Under the grant conditions of the funders, a Creative Commons Attribution 4.0 Generic License has  
670 already been assigned to the Author Accepted Manuscript version that might arise from this  
671 submission.

### 672 **Authors contributions**

673 *Klebsiella* genomic platform integration (KlebNET) conceptualization and coordination: SyB (Sylvain  
674 Brisse), KEH, DMA. cgMLST LIN code conceptualization and developments: MH, AC, SB. BIGSdb-  
675 Pasteur Platform maintenance: FP, BR, BB, SeB (Sebastien Bridel), SyB. Data acquisition and  
676 curation: VP, RI, CR, FP, MH, CC, SeB, ML, KW, CAY, MRP, DA. Data analyses: MH, SeB, KW,  
677 ML, CAY. PubMLST/BIGSdb platform software development: KAJ, MCJM. Pathogenwatch platform  
678 maintenance and software development: DMA, CAY, SD. Data visualization: FP, MH, KW, ML, SeB,  
679 CC. Writing of first draft: SyB, FP, MH. All authors contributed to, and approved, the final version of  
680 the manuscript.

681 **Ethical statements**

682 Not relevant.

683 **Conflicts of interests**

684 The authors declare no conflict of interest.

685 **References**

- 686 Aanensen, D.M., Spratt, B.G., 2005. The multilocus sequence typing network: mlst.net. *Nucleic Acids*  
687 *Res* 33, W728-33.
- 688 Achtman, M., 2008. Evolution, population structure, and phylogeography of genetically monomorphic  
689 bacterial pathogens. *Annu Rev Microbiol* 62, 53–70.
- 690 Achtman, M., Zhou, Z., Charlesworth, J., Baxter, L., 2022. Enterobase: hierarchical clustering of 100  
691 000s of bacterial genomes into species/subspecies and populations. *Philos. Trans. R. Soc. Lond. B.*  
692 *Biol. Sci.* 377, 20210240. <https://doi.org/10.1098/rstb.2021.0240>
- 693 Argimón, S., David, S., Underwood, A., Abrudan, M., Wheeler, N.E., Kekre, M., Abudahab, K.,  
694 Yeats, C.A., Goater, R., Taylor, B., Harste, H., Muddyman, D., Feil, E.J., Brisse, S., Holt, K., Donado-  
695 Godoy, P., Ravikumar, K.L., Okeke, I.N., Carlos, C., Aanensen, D.M., NIHR Global Health Research  
696 Unit on Genomic Surveillance of Antimicrobial Resistance, Fabian Bernal, J., Arevalo, A., Fernanda  
697 Valencia, M., Osma Castro, E.C.D., Nagaraj, G., Shamanna, V., Govindan, V., Prabhu, A., Sravani,  
698 D., Shincy, M.R., Rose, S., Ravishankar, K.N., Oaikhena, A.O., Afolayan, A.O., Ajiboye, J.J.,  
699 Ewomazino Odih, E., Lagrada, M.L., Macaranas, P.K.V., Olorosa, A.M., Gayeta, J.M., Masim,  
700 M.A.L., Herrera, E.M., Molloy, A., Stelling, J., 2021. Rapid Genomic Characterization and Global  
701 Surveillance of *Klebsiella* Using Pathogenwatch. *Clin. Infect. Dis.* 73, S325–S335.  
702 <https://doi.org/10.1093/cid/ciab784>
- 703 Bialek-Davenet, S., Criscuolo, A., Ailloud, F., Passet, V., Jones, L., Delannoy-Vieillard, A.-S., Garin,  
704 B., Le Hello, S., Arlet, G., Nicolas-Chanoine, M.-H., Decré, D., Brisse, S., 2014. Genomic definition  
705 of hypervirulent and multidrug-resistant *Klebsiella pneumoniae* clonal groups. *Emerg. Infect. Dis.* 20,  
706 1812–1820. <https://doi.org/10.3201/eid2011.140206>
- 707 Bounoux, M.-E., Aanensen, D.M., Morand, S., Théraud, M., Spratt, B.G., d'Enfert, C., 2004.  
708 Multilocus sequence typing of *Candida albicans*: strategies, data exchange and applications. *Infect.*  
709 *Genet. Evol. J. Mol. Epidemiol. Evol. Genet. Infect. Dis.* 4, 243–252.  
710 <https://doi.org/10.1016/j.meeqid.2004.06.002>
- 711 Croucher, N.J., Page, A.J., Connor, T.R., Delaney, A.J., Keane, J.A., Bentley, S.D., Parkhill, J., Harris,  
712 S.R., 2015. Rapid phylogenetic analysis of large samples of recombinant bacterial whole genome  
713 sequences using Gubbins. *Nucleic Acids Res.* 43, e15. <https://doi.org/10.1093/nar/gku1196>
- 714 David, S., Reuter, S., Harris, S.R., Glasner, C., Feltwell, T., Argimon, S., Abudahab, K., Goater, R.,  
715 Giani, T., Errico, G., Aspbury, M., Sjunnebo, S., EuSCAPE Working Group, ESGEM Study Group,  
716 Feil, E.J., Rossolini, G.M., Aanensen, D.M., Grundmann, H., 2019. Epidemic of carbapenem-resistant  
717 *Klebsiella pneumoniae* in Europe is driven by nosocomial spread. *Nat. Microbiol.* 4, 1919–1929.  
718 <https://doi.org/10.1038/s41564-019-0492-8>
- 719 Deleo, F.R., Chen, L., Porcella, S.F., Martens, C.A., Kobayashi, S.D., Porter, A.R., Chavda, K.D.,  
720 Jacobs, M.R., Mathema, B., Olsen, R.J., Bonomo, R.A., Musser, J.M., Kreiswirth, B.N., 2014.  
721 Molecular dissection of the evolution of carbapenem-resistant multilocus sequence type 258 *Klebsiella*  
722 *pneumoniae*. *Proc. Natl. Acad. Sci. U. S. A.* 111, 4988–4993.  
723 <https://doi.org/10.1073/pnas.1321364111>
- 724 Feil, E.J., 2004. Small change: keeping pace with microevolution. *Nat Rev Microbiol* 2, 483–95.
- 725 Goris, J., Konstantinidis, K.T., Klappenbach, J.A., Coenye, T., Vandamme, P., Tiedje, J.M., 2007.  
726 DNA-DNA hybridization values and their relationship to whole-genome sequence similarities. *Int J*  
727 *Syst Evol Microbiol* 57, 81–91.

- 728 Hennart, M., Guglielmini, J., Bridel, S., Maiden, M.C.J., Jolley, K.A., Criscuolo, A., Brisse, S., 2022.  
729 A Dual Barcoding Approach to Bacterial Strain Nomenclature: Genomic Taxonomy of *Klebsiella*  
730 *pneumoniae* Strains. *Mol. Biol. Evol.* 39, msac135. <https://doi.org/10.1093/molbev/msac135>
- 731 Hetland, M.A.K., Hawkey, J., Bernhoff, E., Bakksjø, R.-J., Kaspersen, H., Rettedal, S.I., Sundsfjord,  
732 A., Holt, K.E., Löhr, I.H., 2023. Within-patient and global evolutionary dynamics of *Klebsiella*  
733 *pneumoniae* ST17. *Microb. Genomics* 9, mgen001005. <https://doi.org/10.1099/mgen.0.001005>
- 734 International Code of Nomenclature of Prokaryotes, 2019. . *Int. J. Syst. Evol. Microbiol.* 69, S1–S111.  
735 <https://doi.org/10.1099/ijsem.0.000778>
- 736 Jolley, K.A., Bray, J.E., Maiden, M.C.J., 2018. Open-access bacterial population genomics: BIGSdb  
737 software, the PubMLST.org website and their applications. *Wellcome Open Res.* 3, 124.  
738 <https://doi.org/10.12688/wellcomeopenres.14826.1>
- 739 Jolley, K.A., Bray, J.E., Maiden, M.C.J., 2017. A RESTful application programming interface for the  
740 PubMLST molecular typing and genome databases. *Database* 2017, bax060.  
741 <https://doi.org/10.1093/database/bax060>
- 742 Konings, F., Perkins, M.D., Kuhn, J.H., Pallen, M.J., Alm, E.J., Archer, B.N., Barakat, A., Bedford,  
743 T., Bhiman, J.N., Caly, L., Carter, L.L., Cullinane, A., de Oliveira, T., Druce, J., El Masry, I., Evans,  
744 R., Gao, G.F., Gorbalenya, A.E., Hamblion, E., Herring, B.L., Hodcroft, E., Holmes, E.C., Kakkar,  
745 M., Khare, S., Koopmans, M.P.G., Korber, B., Leite, J., MacCannell, D., Marklewitz, M., Maurer-  
746 Stroh, S., Rico, J.A.M., Munster, V.J., Neher, R., Munnink, B.O., Pavlin, B.I., Peiris, M., Poon, L.,  
747 Pybus, O., Rambaut, A., Resende, P., Subissi, L., Thiel, V., Tong, S., van der Werf, S., von Gottberg,  
748 A., Ziebuhr, J., Van Kerkhove, M.D., 2021. SARS-CoV-2 Variants of Interest and Concern naming  
749 scheme conducive for global discourse. *Nat. Microbiol.* 6, 821–823. [https://doi.org/10.1038/s41564-](https://doi.org/10.1038/s41564-021-00932-w)  
750 [021-00932-w](https://doi.org/10.1038/s41564-021-00932-w)
- 751 Konstantinidis, K.T., Tiedje, J.M., 2005. Towards a genome-based taxonomy for prokaryotes. *J*  
752 *Bacteriol* 187, 6258–64.
- 753 Lam, M.M.C., Holt, K.E., Wyres, K.L., 2023. Comment on: MDR carbapenemase-producing  
754 *Klebsiella pneumoniae* of the hypervirulence-associated ST23 clone in Poland, 2009–19. *J.*  
755 *Antimicrob. Chemother.* 78, 1132–1134. <https://doi.org/10.1093/jac/dkad028>
- 756 Lam, M.M.C., Wick, R.R., Judd, L.M., Holt, K.E., Wyres, K.L., 2022. Kaptive 2.0: updated capsule  
757 and lipopolysaccharide locus typing for the *Klebsiella pneumoniae* species complex. *Microb.*  
758 *Genomics* 8. <https://doi.org/10.1099/mgen.0.000800>
- 759 Lam, M.M.C., Wick, R.R., Watts, S.C., Cerdeira, L.T., Wyres, K.L., Holt, K.E., 2021. A genomic  
760 surveillance framework and genotyping tool for *Klebsiella pneumoniae* and its related species  
761 complex. *Nat. Commun.* 12, 4188. <https://doi.org/10.1038/s41467-021-24448-3>
- 762 Lam, M.M.C., Wyres, K.L., Duchêne, S., Wick, R.R., Judd, L.M., Gan, Y.-H., Hoh, C.-H., Archuleta,  
763 S., Molton, J.S., Kalimuddin, S., Koh, T.H., Passet, V., Brisse, S., Holt, K.E., 2018. Population  
764 genomics of hypervirulent *Klebsiella pneumoniae* clonal-group 23 reveals early emergence and rapid  
765 global dissemination. *Nat. Commun.* 9, 2703. <https://doi.org/10.1038/s41467-018-05114-7>
- 766 Maiden, M.C., 2006. Multilocus sequence typing of bacteria. *Annu Rev Microbiol* 60, 561–88.
- 767 Maiden, M.C., Bygraves, J.A., Feil, E., Morelli, G., Russell, J.E., Urwin, R., Zhang, Q., Zhou, J.,  
768 Zurth, K., Caugant, D.A., Feavers, I.M., Achtman, M., Spratt, B.G., 1998. Multilocus sequence typing:  
769 a portable approach to the identification of clones within populations of pathogenic microorganisms.  
770 *Proc Natl Acad Sci U A* 95, 3140–5.

- 771 Maiden, M.C., van Rensburg, M.J., Bray, J.E., Earle, S.G., Ford, S.A., Jolley, K.A., McCarthy, N.D.,  
772 2013. MLST revisited: the gene-by-gene approach to bacterial genomics. *Nat Rev Microbiol* 11, 728–  
773 36. <https://doi.org/10.1038/nrmicro3093>
- 774 Marakeby, H., Badr, E., Torkey, H., Song, Y., Leman, S., Monteil, C.L., Heath, L.S., Vinatzer, B.A.,  
775 2014. A system to automatically classify and name any individual genome-sequenced organism  
776 independently of current biological classification and nomenclature. *PloS One* 9, e89142.  
777 <https://doi.org/10.1371/journal.pone.0089142>
- 778 Martin, M.J., Corey, B.W., Sannio, F., Hall, L.R., MacDonald, U., Jones, B.T., Mills, E.G., Harless,  
779 C., Stam, J., Maybank, R., Kwak, Y., Schaufler, K., Becker, K., Hübner, N.-O., Cresti, S., Tordini, G.,  
780 Valassina, M., Cusi, M.G., Bennett, J.W., Russo, T.A., McGann, P.T., Lebreton, F., Docquier, J.-D.,  
781 2021. Anatomy of an extensively drug-resistant *Klebsiella pneumoniae* outbreak in Tuscany, Italy.  
782 *Proc. Natl. Acad. Sci. U. S. A.* 118, e2110227118. <https://doi.org/10.1073/pnas.2110227118>
- 783 Minh, B.Q., Schmidt, H.A., Chernomor, O., Schrempf, D., Woodhams, M.D., von Haeseler, A.,  
784 Lanfear, R., 2020. IQ-TREE 2: New Models and Efficient Methods for Phylogenetic Inference in the  
785 Genomic Era. *Mol. Biol. Evol.* 37, 1530–1534. <https://doi.org/10.1093/molbev/msaa015>
- 786 Nadon, C., Van Walle, I., Gerner-Smidt, P., Campos, J., Chinen, I., Concepcion-Acevedo, J., Gilpin,  
787 B., Smith, A.M., Man Kam, K., Perez, E., Trees, E., Kubota, K., Takkinen, J., Nielsen, E.M., Carleton,  
788 H., FWD-NEXT Expert Panel, 2017. PulseNet International: Vision for the implementation of whole  
789 genome sequencing (WGS) for global food-borne disease surveillance. *Euro Surveill. Bull. Eur. Sur*  
790 *Mal. Transm. Eur. Commun. Dis. Bull.* 22. <https://doi.org/10.2807/1560-7917.ES.2017.22.23.30544>
- 791 Paradis, E., Claude, J., Strimmer, K., 2004. APE: Analyses of Phylogenetics and Evolution in R  
792 language. *Bioinformatics* 20, 289–290. <https://doi.org/10.1093/bioinformatics/btg412>
- 793 Prim, R.C., 1957. Shortest connection networks and some generalizations. *Bell Syst Tech J* 1389–  
794 1401.
- 795 Rambaut, A., Holmes, E.C., O’Toole, Á., Hill, V., McCrone, J.T., Ruis, C., du Plessis, L., Pybus,  
796 O.G., 2020. A dynamic nomenclature proposal for SARS-CoV-2 lineages to assist genomic  
797 epidemiology. *Nat. Microbiol.* 5, 1403–1407. <https://doi.org/10.1038/s41564-020-0770-5>
- 798 Revell, L.J., 2024. phytools 2.0: an updated R ecosystem for phylogenetic comparative methods (and  
799 other things). *PeerJ* 12, e16505. <https://doi.org/10.7717/peerj.16505>
- 800 Rodrigues, C., Desai, S., Passet, V., Gajjar, D., Brisse, S., 2022. Genomic evolution of the globally  
801 disseminated multidrug-resistant *Klebsiella pneumoniae* clonal group 147. *Microb. Genomics* 8.  
802 <https://doi.org/10.1099/mgen.0.000737>
- 803 Stamatakis, A., 2014. RAxML version 8: a tool for phylogenetic analysis and post-analysis of large  
804 phylogenies. *Bioinformatics* 30, 1312–1313. <https://doi.org/10.1093/bioinformatics/btu033>
- 805 Struelens, M.J., Brisse, S., 2013. From molecular to genomic epidemiology: transforming surveillance  
806 and control of infectious diseases. *Euro Surveill* 18, 20386.
- 807 Struelens, M.J., De Gheldre, Y., Deplano, A., 1998. Comparative and library epidemiological typing  
808 systems: outbreak investigations versus surveillance systems. *Infect Control Hosp Epidemiol* 19, 565–  
809 9.
- 810 van Belkum, A., Tassios, P.T., Dijkshoorn, L., Haeggman, S., Cookson, B., Fry, N.K., Fussing, V.,  
811 Green, J., Feil, E., Gerner-Smidt, P., Brisse, S., Struelens, M., 2007. Guidelines for the validation and  
812 application of typing methods for use in bacterial epidemiology. *Clin Microbiol Infect* 13 Suppl 3, 1–  
813 46.

- 814 Vinatzer, B.A., Tian, L., Heath, L.S., 2017. A proposal for a portal to make earth's microbial diversity  
815 easily accessible and searchable. *Antonie Van Leeuwenhoek* 110, 1271–1279.  
816 <https://doi.org/10.1007/s10482-017-0849-z>
- 817 Wang, J., Feng, Y., Zong, Z., 2023. The Origins of ST11 KL64 *Klebsiella pneumoniae*: a Genome-  
818 Based Study. *Microbiol. Spectr.* 11, e0416522. <https://doi.org/10.1128/spectrum.04165-22>
- 819 Wyres, K.L., Hawkey, J., Hetland, M.A.K., Fostervold, A., Wick, R.R., Judd, L.M., Hamidian, M.,  
820 Howden, B.P., Löhr, I.H., Holt, K.E., 2019. Emergence and rapid global dissemination of CTX-M-15-  
821 associated *Klebsiella pneumoniae* strain ST307. *J. Antimicrob. Chemother.* 74, 577–581.  
822 <https://doi.org/10.1093/jac/dky492>
- 823 Wyres, K.L., Lam, M.M.C., Holt, K.E., 2020. Population genomics of *Klebsiella pneumoniae*. *Nat.*  
824 *Rev. Microbiol.* 18, 344–359. <https://doi.org/10.1038/s41579-019-0315-1>
- 825 Wyres, K.L., Wick, R.R., Gorrie, C., Jenney, A., Follador, R., Thomson, N.R., Holt, K.E., 2016.  
826 Identification of *Klebsiella* capsule synthesis loci from whole genome data. *Microb. Genomics* 2,  
827 e000102. <https://doi.org/10.1099/mgen.0.000102>
- 828 Yeo, M., Mauricio, I.L., Messenger, L.A., Lewis, M.D., Llewellyn, M.S., Acosta, N., Bhattacharyya,  
829 T., Diosque, P., Carrasco, H.J., Miles, M.A., 2011. Multilocus sequence typing (MLST) for lineage  
830 assignment and high resolution diversity studies in *Trypanosoma cruzi*. *PLoS Negl. Trop. Dis.* 5,  
831 e1049. <https://doi.org/10.1371/journal.pntd.0001049>
- 832 Yu, G., Smith, D.K., Zhu, H., Guan, Y., Lam, T.T.-Y., 2017. ggtree: an r package for visualization and  
833 annotation of phylogenetic trees with their covariates and other associated data. *Methods Ecol. Evol.*  
834 8, 28–36. <https://doi.org/10.1111/2041-210X.12628>
- 835 Zhou, K., Xiao, T., David, S., Wang, Q., Zhou, Y., Guo, L., Aanensen, D., Holt, K.E., Thomson, N.R.,  
836 Grundmann, H., Shen, P., Xiao, Y., 2020. Novel Subclone of Carbapenem-Resistant *Klebsiella*  
837 *pneumoniae* Sequence Type 11 with Enhanced Virulence and Transmissibility, China. *Emerg. Infect.*  
838 *Dis.* 26, 289–297. <https://doi.org/10.3201/eid2602.190594>
- 839 Zhou, K., Xue, C.-X., Xu, T., Shen, P., Wei, S., Wyres, K.L., Lam, M.M.C., Liu, J., Lin, H., Chen, Y.,  
840 Holt, K.E., BRICS Working Group, Xiao, Y., 2023. A point mutation in recC associated with  
841 subclonal replacement of carbapenem-resistant *Klebsiella pneumoniae* ST11 in China. *Nat. Commun.*  
842 14, 2464. <https://doi.org/10.1038/s41467-023-38061-z>
- 843 Zhou, Z., Charlesworth, J., Achtman, M., 2021. HierCC: A multi-level clustering scheme for  
844 population assignments based on core genome MLST. *Bioinforma. Oxf. Engl.* btab234.  
845 <https://doi.org/10.1093/bioinformatics/btab234>
- 846
